# Supplementary material for: Evaluation of individual and ensemble probabilistic forecasts of COVID-19 mortality in the US
Source: bioRxiv or medRxiv preprint supplement (doi:10.1101/2021.02.03.21250974), 2021-12-10

# Summer 2020

## Arizona

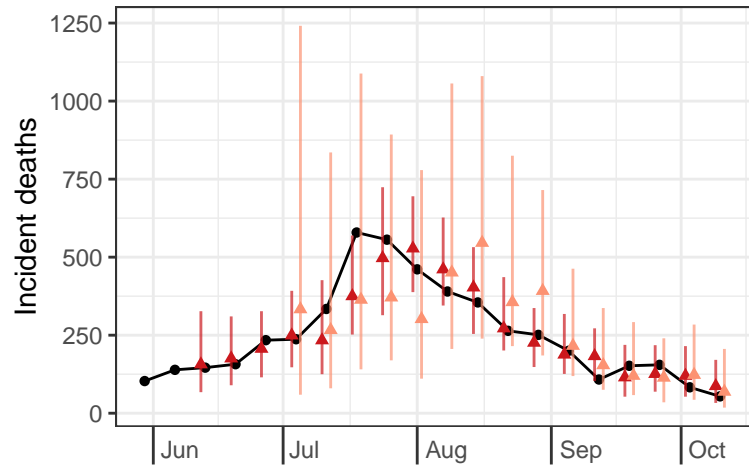

## Florida

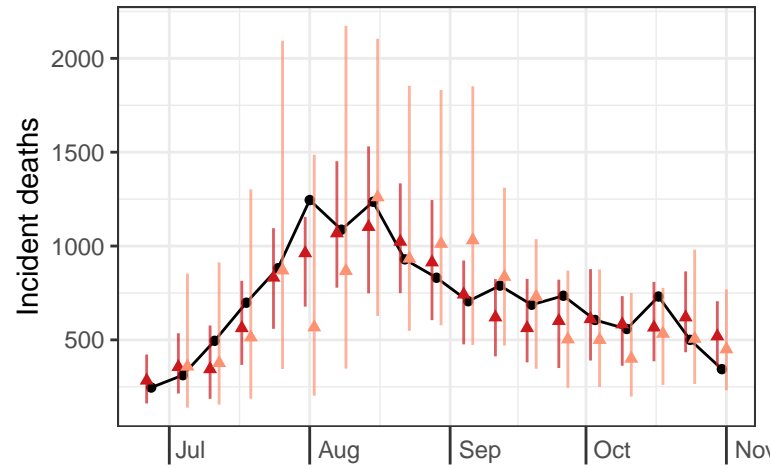

## South Carolina

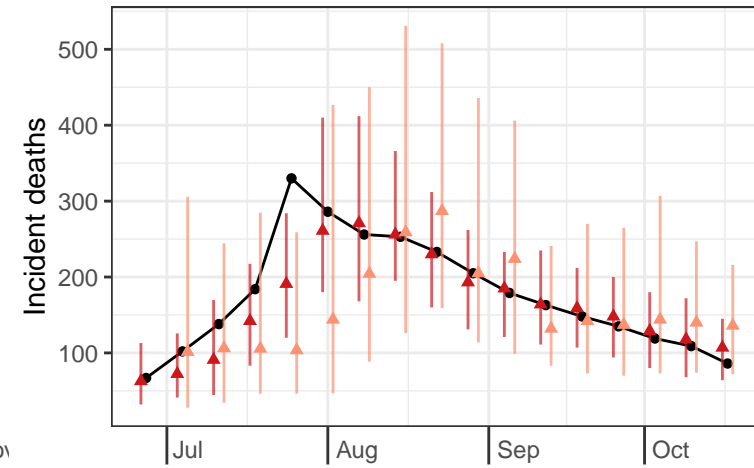

## Mississippi

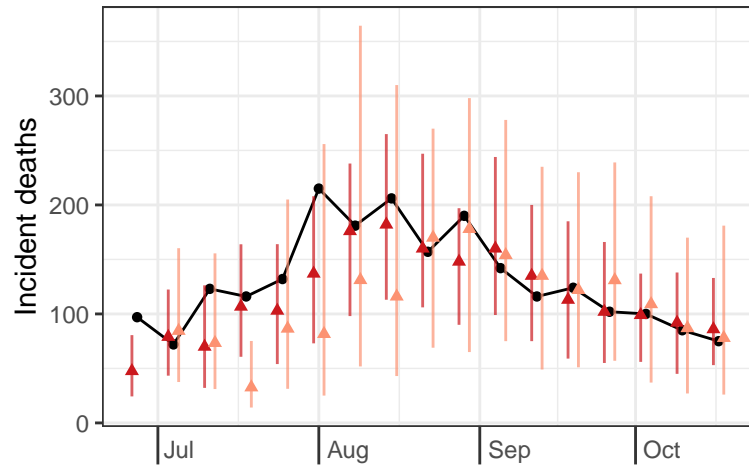

## California

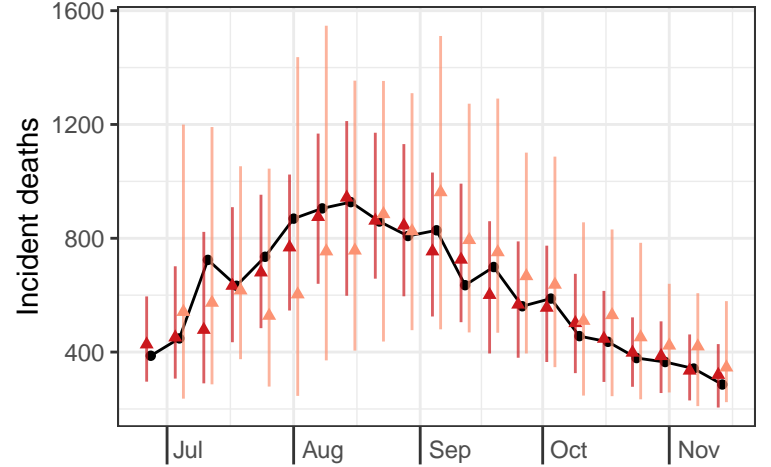

## Louisiana

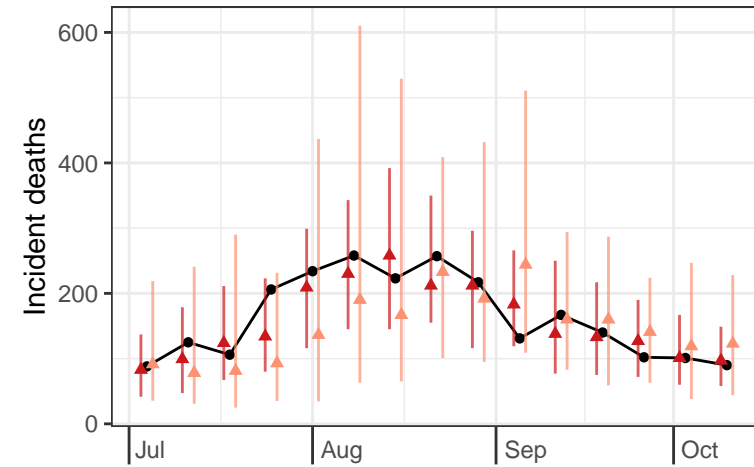

## Nevada

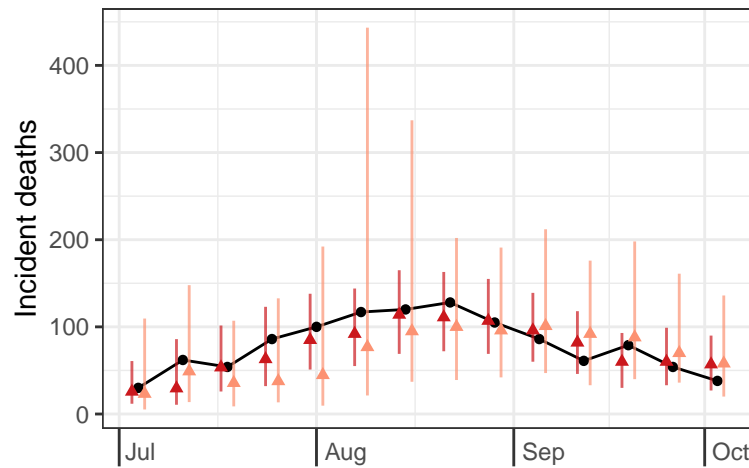

## Utah

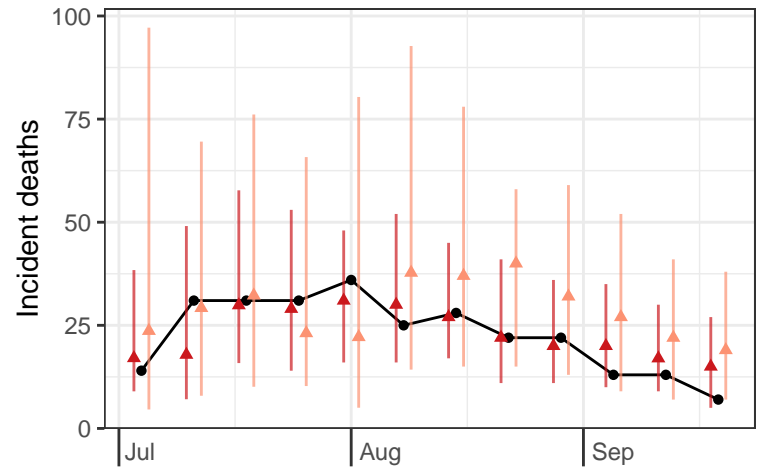

## Georgia

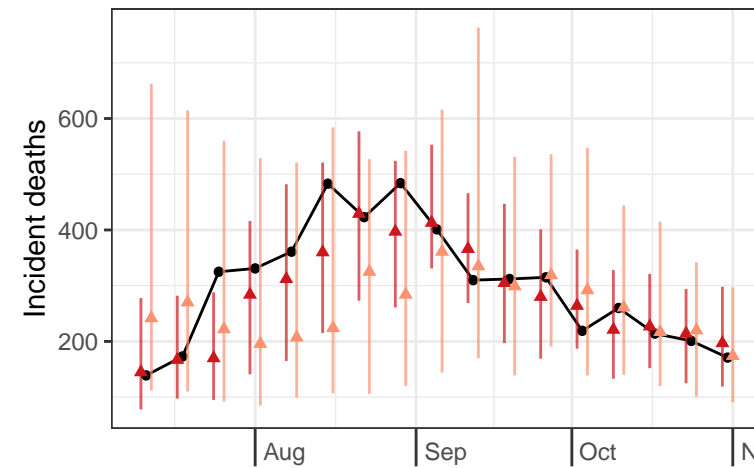

# Fall/Winter 2020/2021

## North Dakota

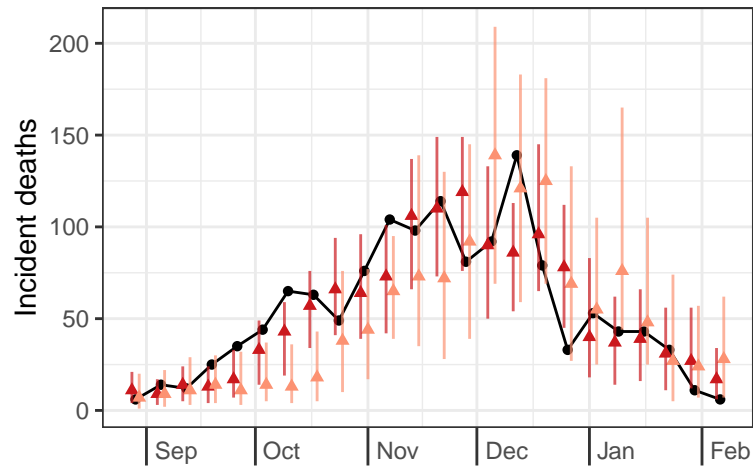

## Idaho

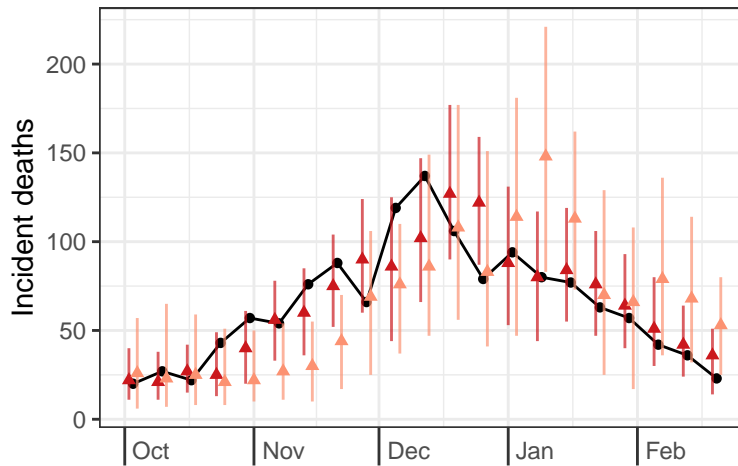

## Minnesota

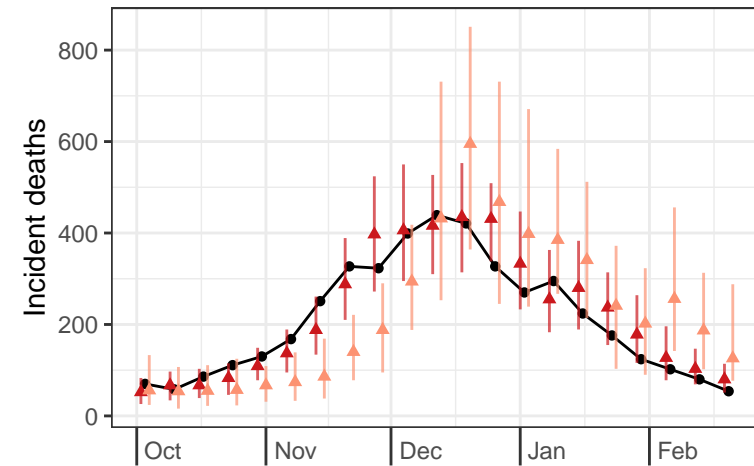

## Pennsylvania

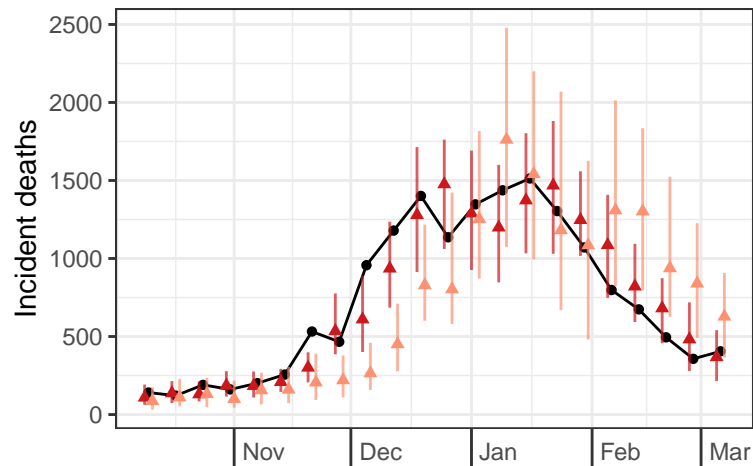

## District of Columbia

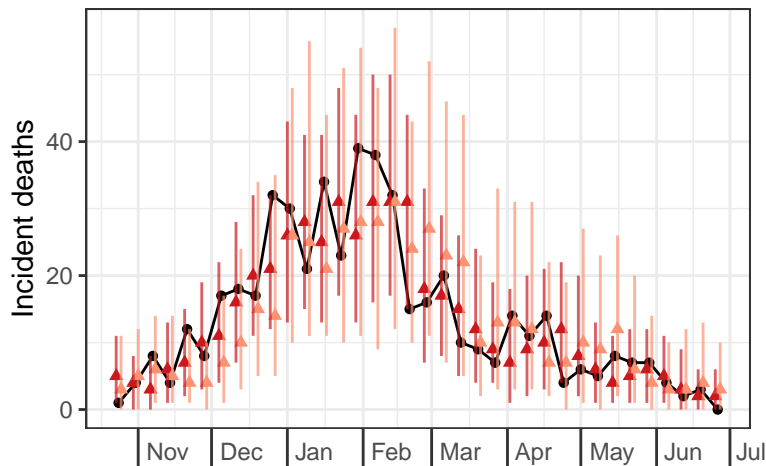

## Colorado

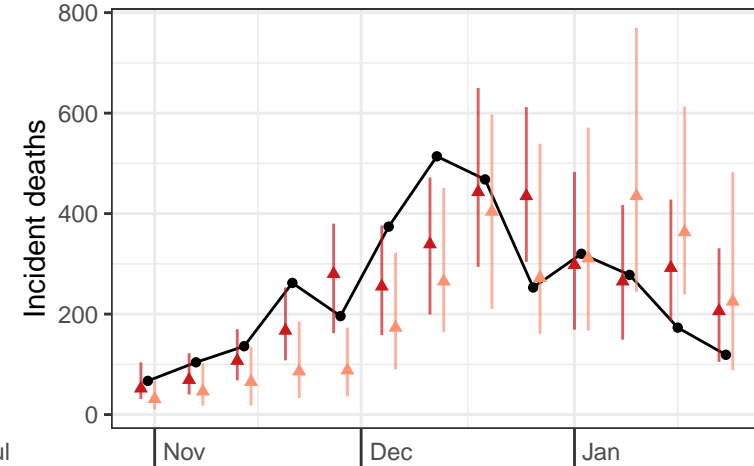

## Puerto Rico

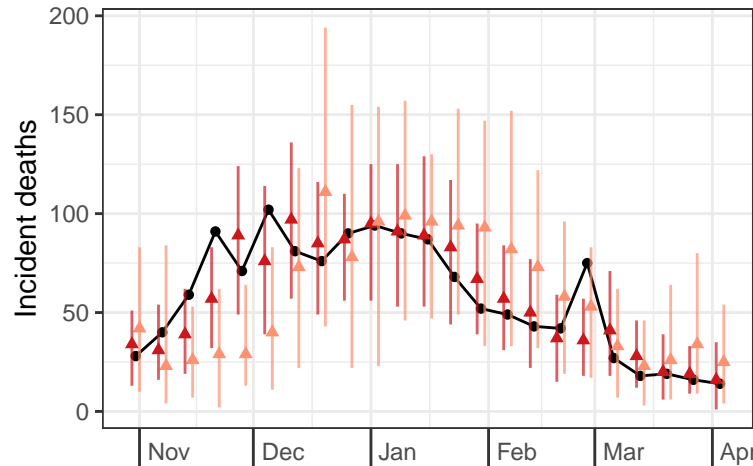

## Nevada

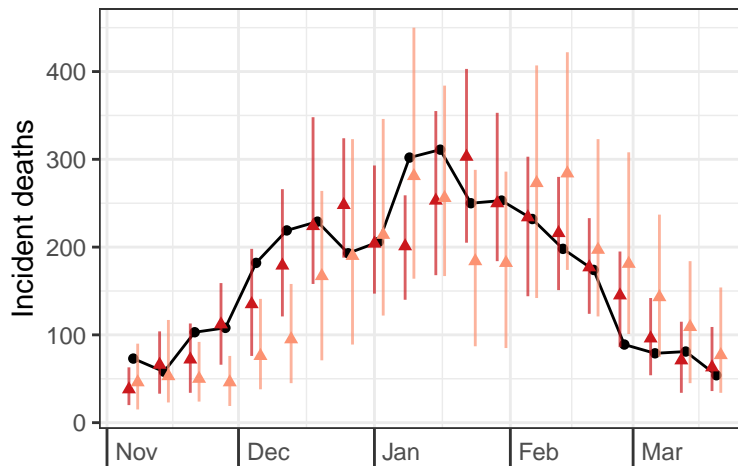

## California

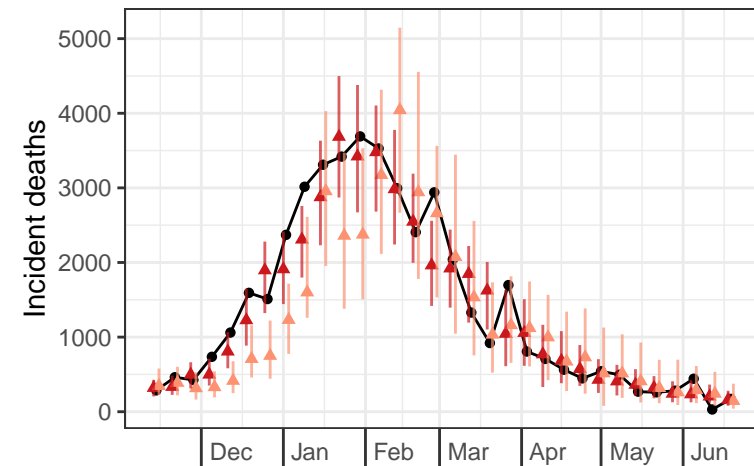

# Alpha variant 2021

## Michigan

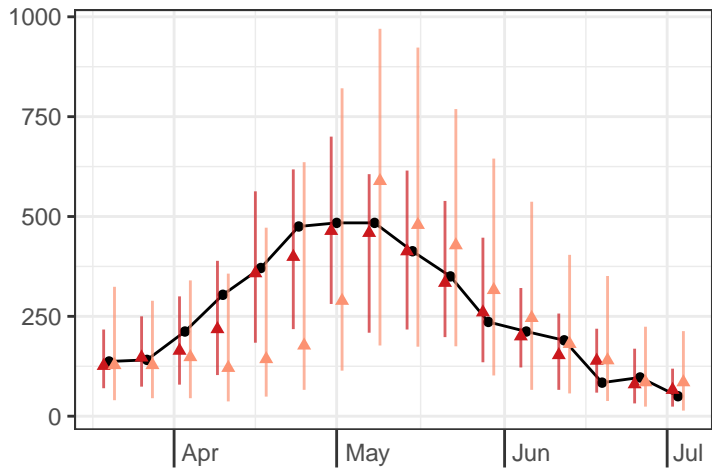

## Minnesota

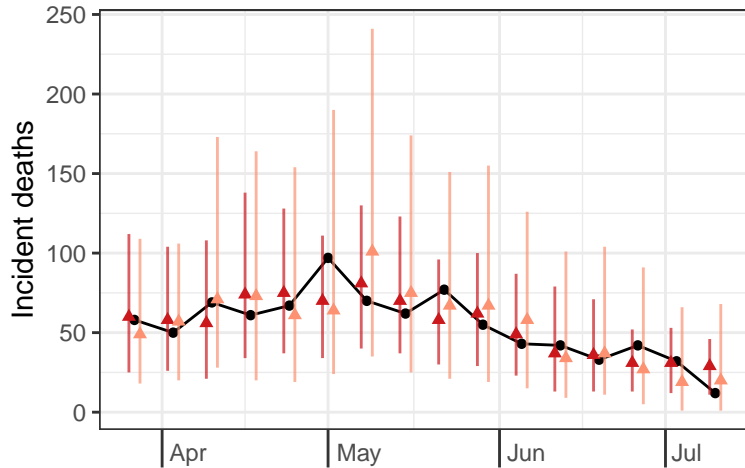

## Puerto Rico

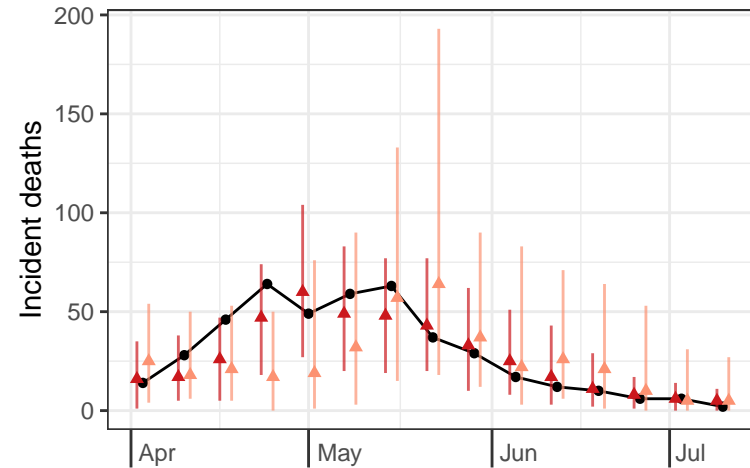

## Pennsylvania

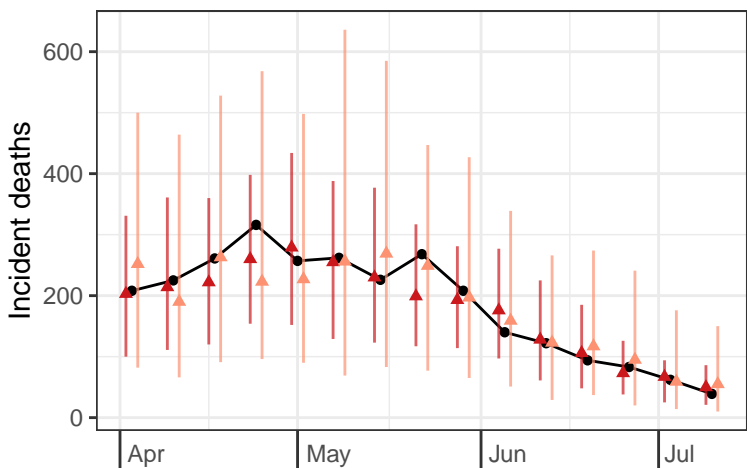

## Colorado

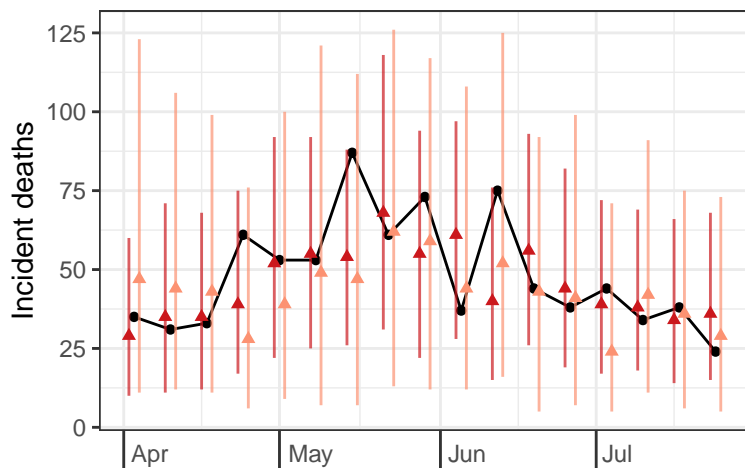

## Illinois

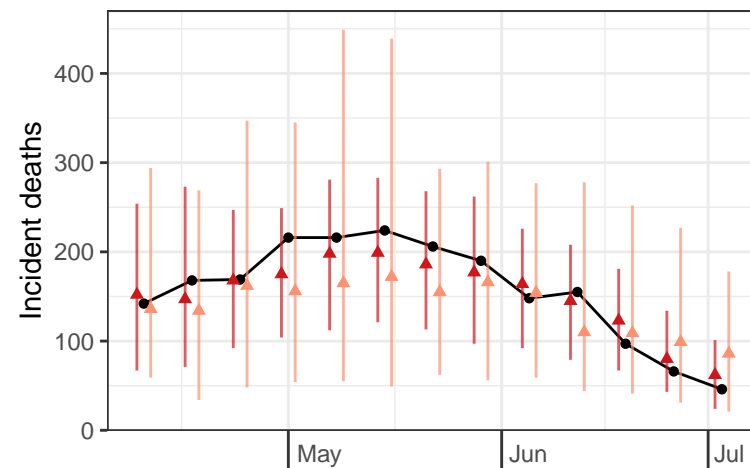

# Delta variant 2021

## Mississippi

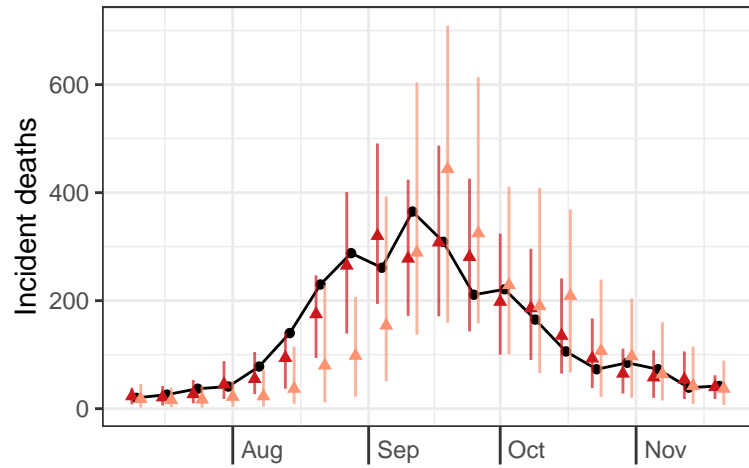

## Texas

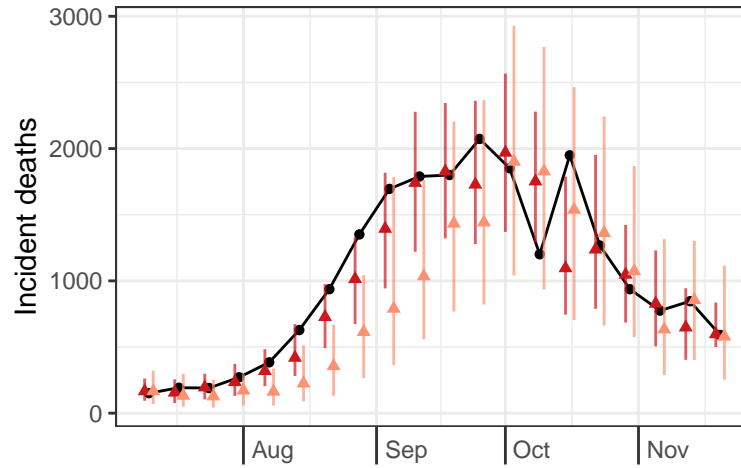

## Florida

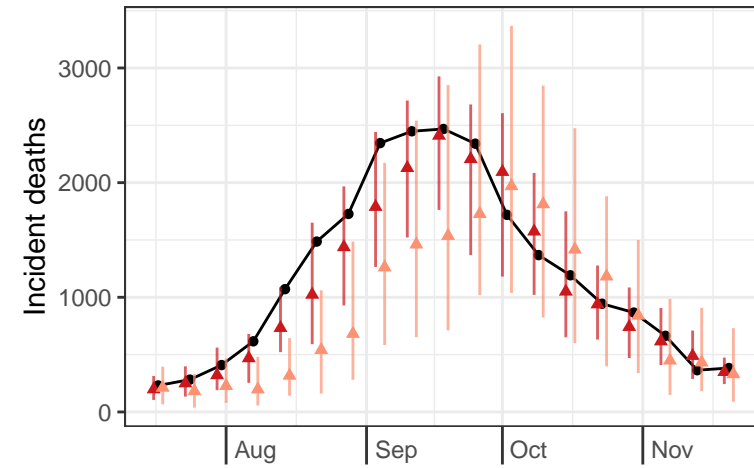

## North Carolina

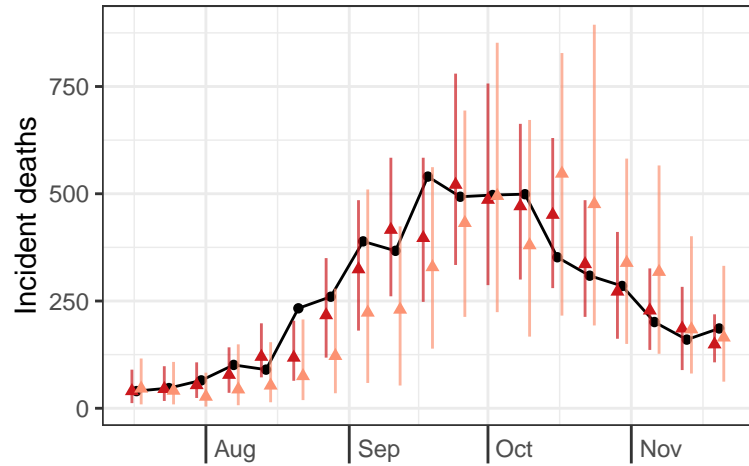

## Louisiana

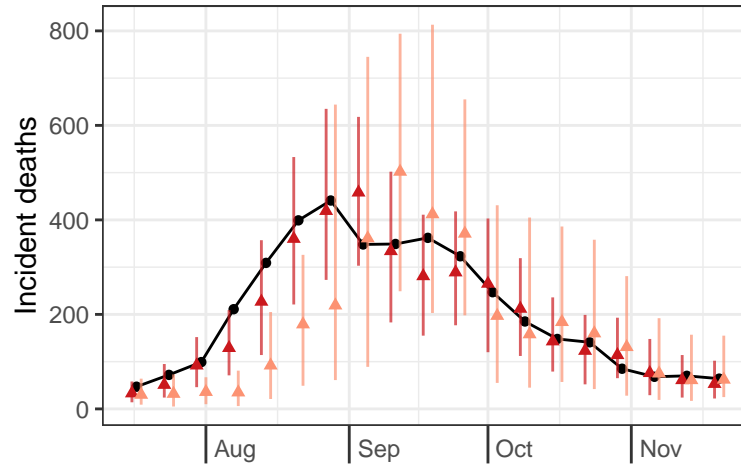

## Puerto Rico

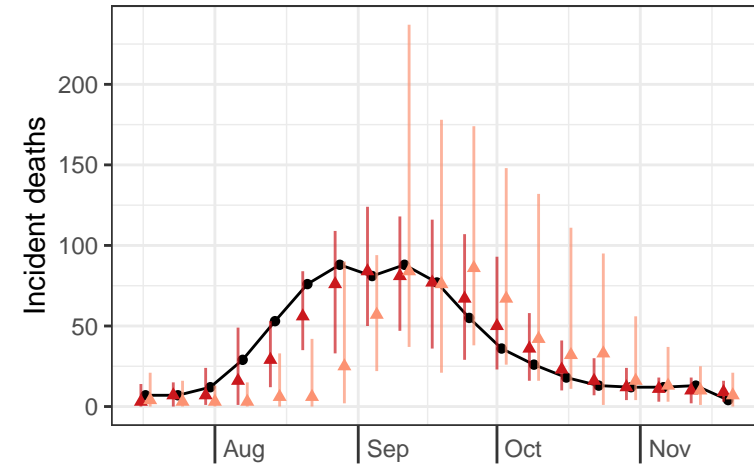

## Alabama

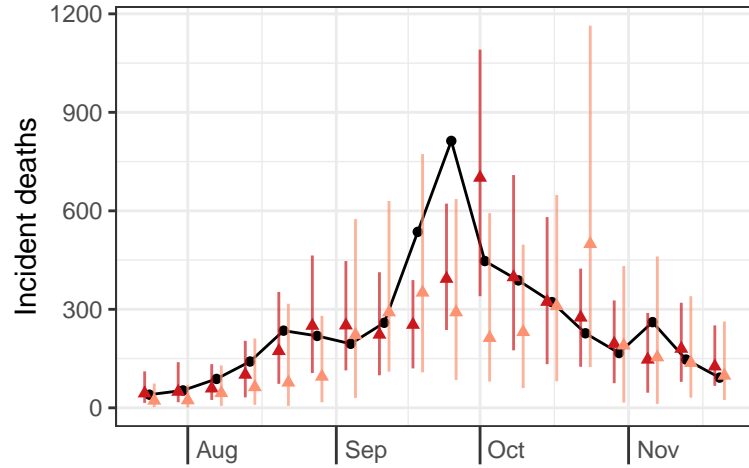

## Georgia

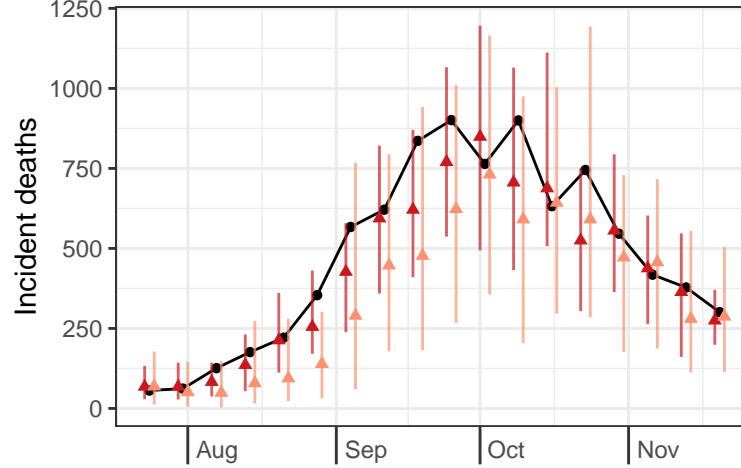

## North Carolina

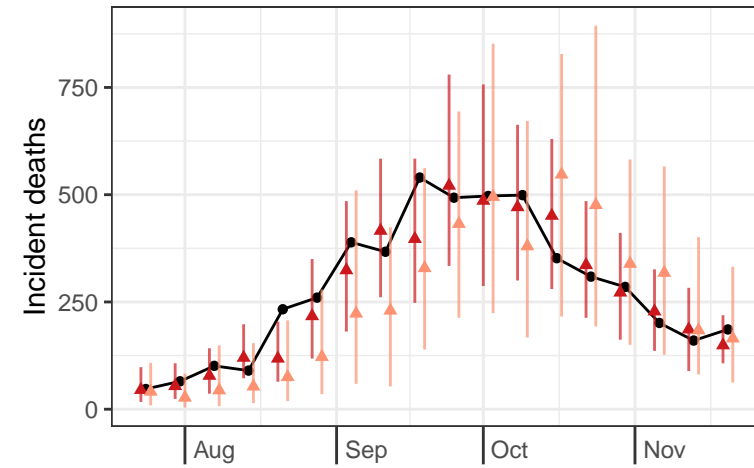

Supplement: Supplementary file [file media-3.pdf]
