# Supplementary material for: Evaluation of individual and ensemble probabilistic forecasts of COVID-19 mortality in the US
Source: bioRxiv or medRxiv preprint supplement (doi:10.1101/2021.02.03.21250974), 2021-12-10
Supplement: Supplementary file [file media-2.pdf]

Incident deaths reported

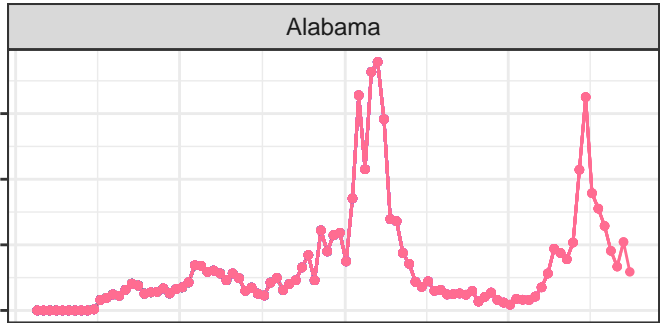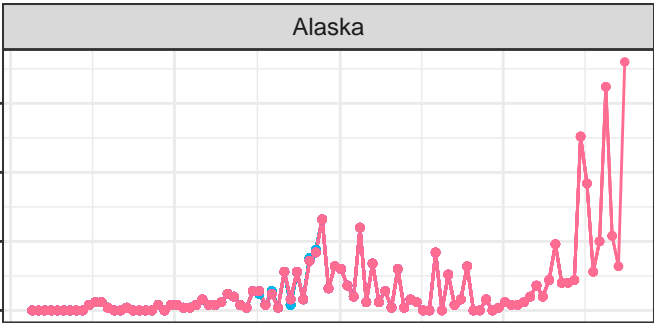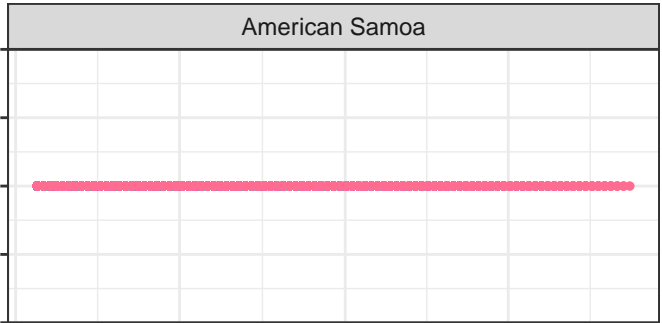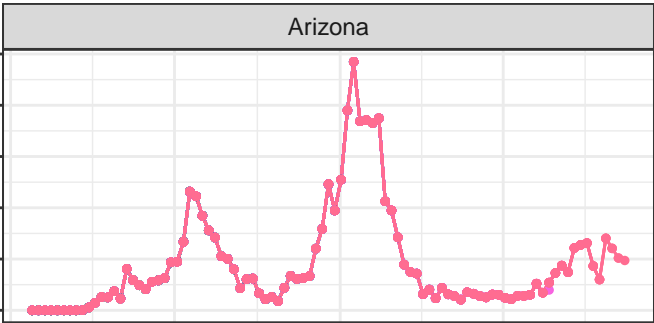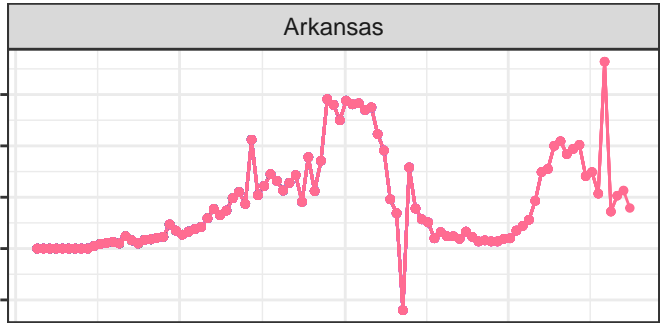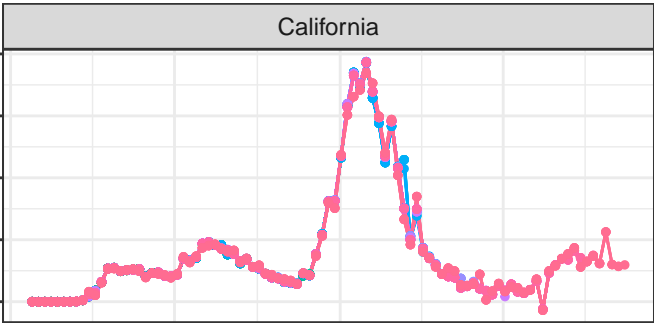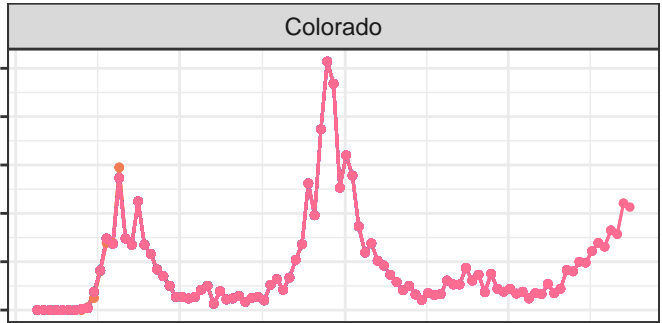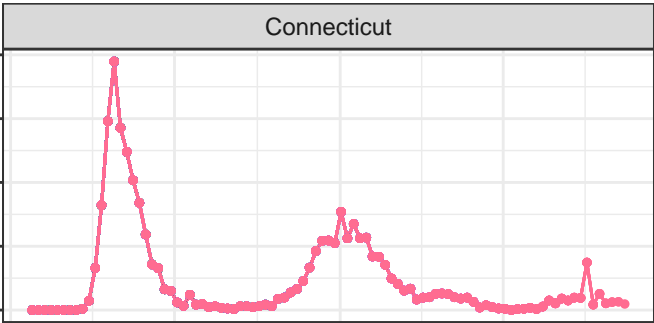

2020-01 2020-07 2021-01 2021-07 2020-01 2020-07 2021-01 2021-07

Epi Week

- Revision Date
- 2020-05-04
  - 2020-05-11
  - 2020-05-18
  - 2020-05-25
  - 2020-06-01
  - 2020-06-08
  - 2020-06-15
  - 2020-06-22
  - 2020-06-29
  - 2020-07-06
  - 2020-07-13
  - 2020-07-20
  - 2020-07-27
  - 2020-08-03
  - 2020-08-10
  - 2020-08-17
  - 2020-08-24
  - 2020-08-31
  - 2020-09-07
  - 2020-09-14
  - 2020-09-21
  - 2020-09-28
  - 2020-10-05
  - 2020-10-12
  - 2020-10-19
  - 2020-10-26
  - 2020-11-02
  - 2020-11-09
  - 2020-11-16
  - 2020-11-23
  - 2020-11-30
  - 2020-12-07
  - 2020-12-14
  - 2020-12-21
  - 2020-12-28
  - 2021-01-04
  - 2021-01-11
  - 2021-01-18
  - 2021-01-25
  - 2021-02-01
  - 2021-02-08
  - 2021-02-15
  - 2021-02-22
  - 2021-03-01
  - 2021-03-08
  - 2021-03-15
  - 2021-03-22
  - 2021-03-29
  - 2021-04-05
  - 2021-04-12
  - 2021-04-19
  - 2021-04-26
  - 2021-05-03
  - 2021-05-10
  - 2021-05-17
  - 2021-05-24
  - 2021-05-31
  - 2021-06-07
  - 2021-06-14
  - 2021-06-21
  - 2021-06-28
  - 2021-07-05
  - 2021-07-12
  - 2021-07-19
  - 2021-07-26
  - 2021-08-02
  - 2021-08-09
  - 2021-08-16
  - 2021-08-23
  - 2021-08-30
  - 2021-09-06
  - 2021-09-13
  - 2021-09-20
  - 2021-09-27
  - 2021-10-04
  - 2021-10-11
  - 2021-10-18
  - 2021-10-25
  - 2021-11-01
  - 2021-11-08
  - 2021-11-15

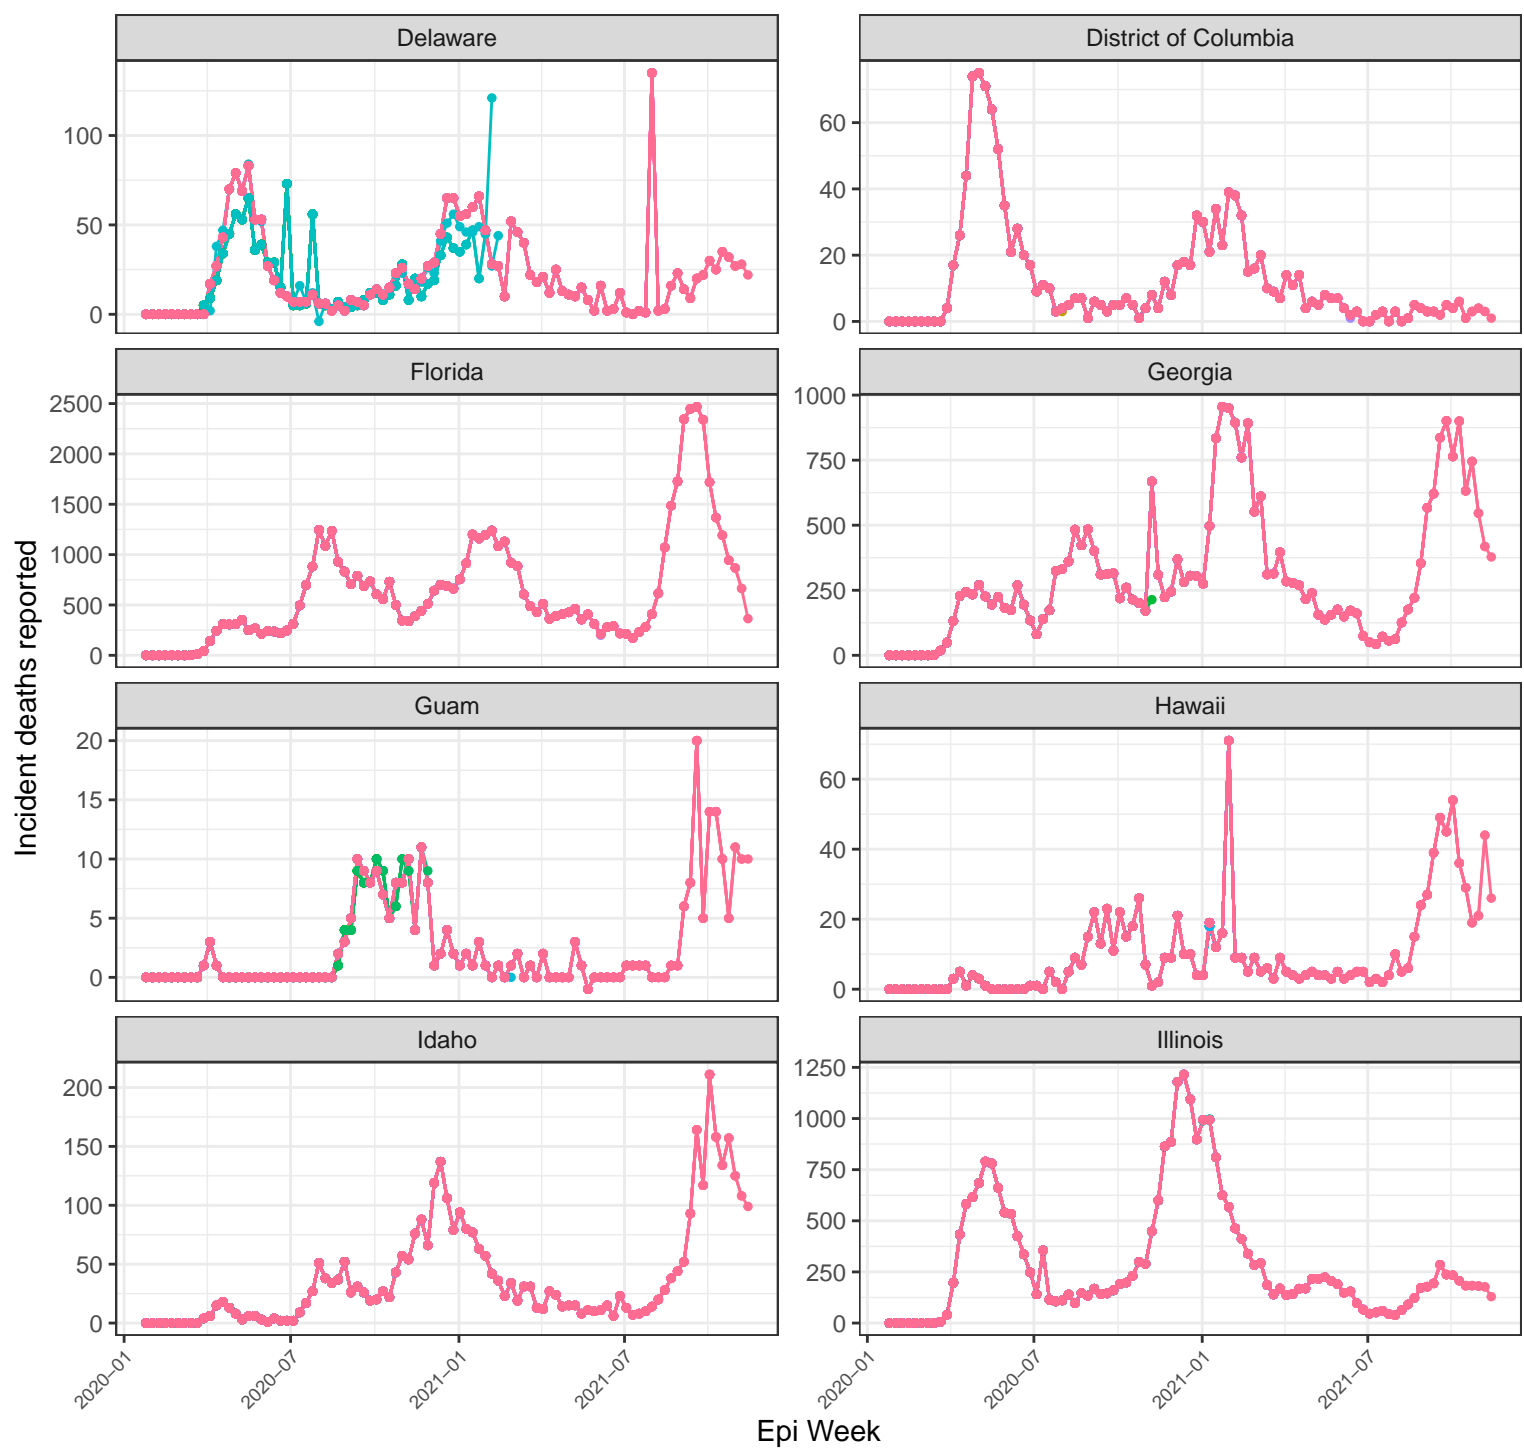

- Revision Date
- |            |            |            |            |            |
|------------|------------|------------|------------|------------|
| 2020-05-04 | 2020-08-31 | 2020-12-28 | 2021-04-26 | 2021-08-23 |
| 2020-05-11 | 2020-09-07 | 2021-01-04 | 2021-05-03 | 2021-08-30 |
| 2020-05-18 | 2020-09-14 | 2021-01-11 | 2021-05-10 | 2021-09-06 |
| 2020-05-25 | 2020-09-21 | 2021-01-18 | 2021-05-17 | 2021-09-13 |
| 2020-06-01 | 2020-09-28 | 2021-01-25 | 2021-05-24 | 2021-09-20 |
| 2020-06-08 | 2020-10-05 | 2021-02-01 | 2021-05-31 | 2021-09-27 |
| 2020-06-15 | 2020-10-12 | 2021-02-08 | 2021-06-07 | 2021-10-04 |
| 2020-06-22 | 2020-10-19 | 2021-02-15 | 2021-06-14 | 2021-10-11 |
| 2020-06-29 | 2020-10-26 | 2021-02-22 | 2021-06-21 | 2021-10-18 |
| 2020-07-06 | 2020-11-02 | 2021-03-01 | 2021-06-28 | 2021-10-25 |
| 2020-07-13 | 2020-11-09 | 2021-03-08 | 2021-07-05 | 2021-11-01 |
| 2020-07-20 | 2020-11-16 | 2021-03-15 | 2021-07-12 | 2021-11-08 |
| 2020-07-27 | 2020-11-23 | 2021-03-22 | 2021-07-19 | 2021-11-15 |
| 2020-08-03 | 2020-11-30 | 2021-03-29 | 2021-07-26 |            |
| 2020-08-10 | 2020-12-07 | 2021-04-05 | 2021-08-02 |            |
| 2020-08-17 | 2020-12-14 | 2021-04-12 | 2021-08-09 |            |
| 2020-08-24 | 2020-12-21 | 2021-04-19 | 2021-08-16 |            |

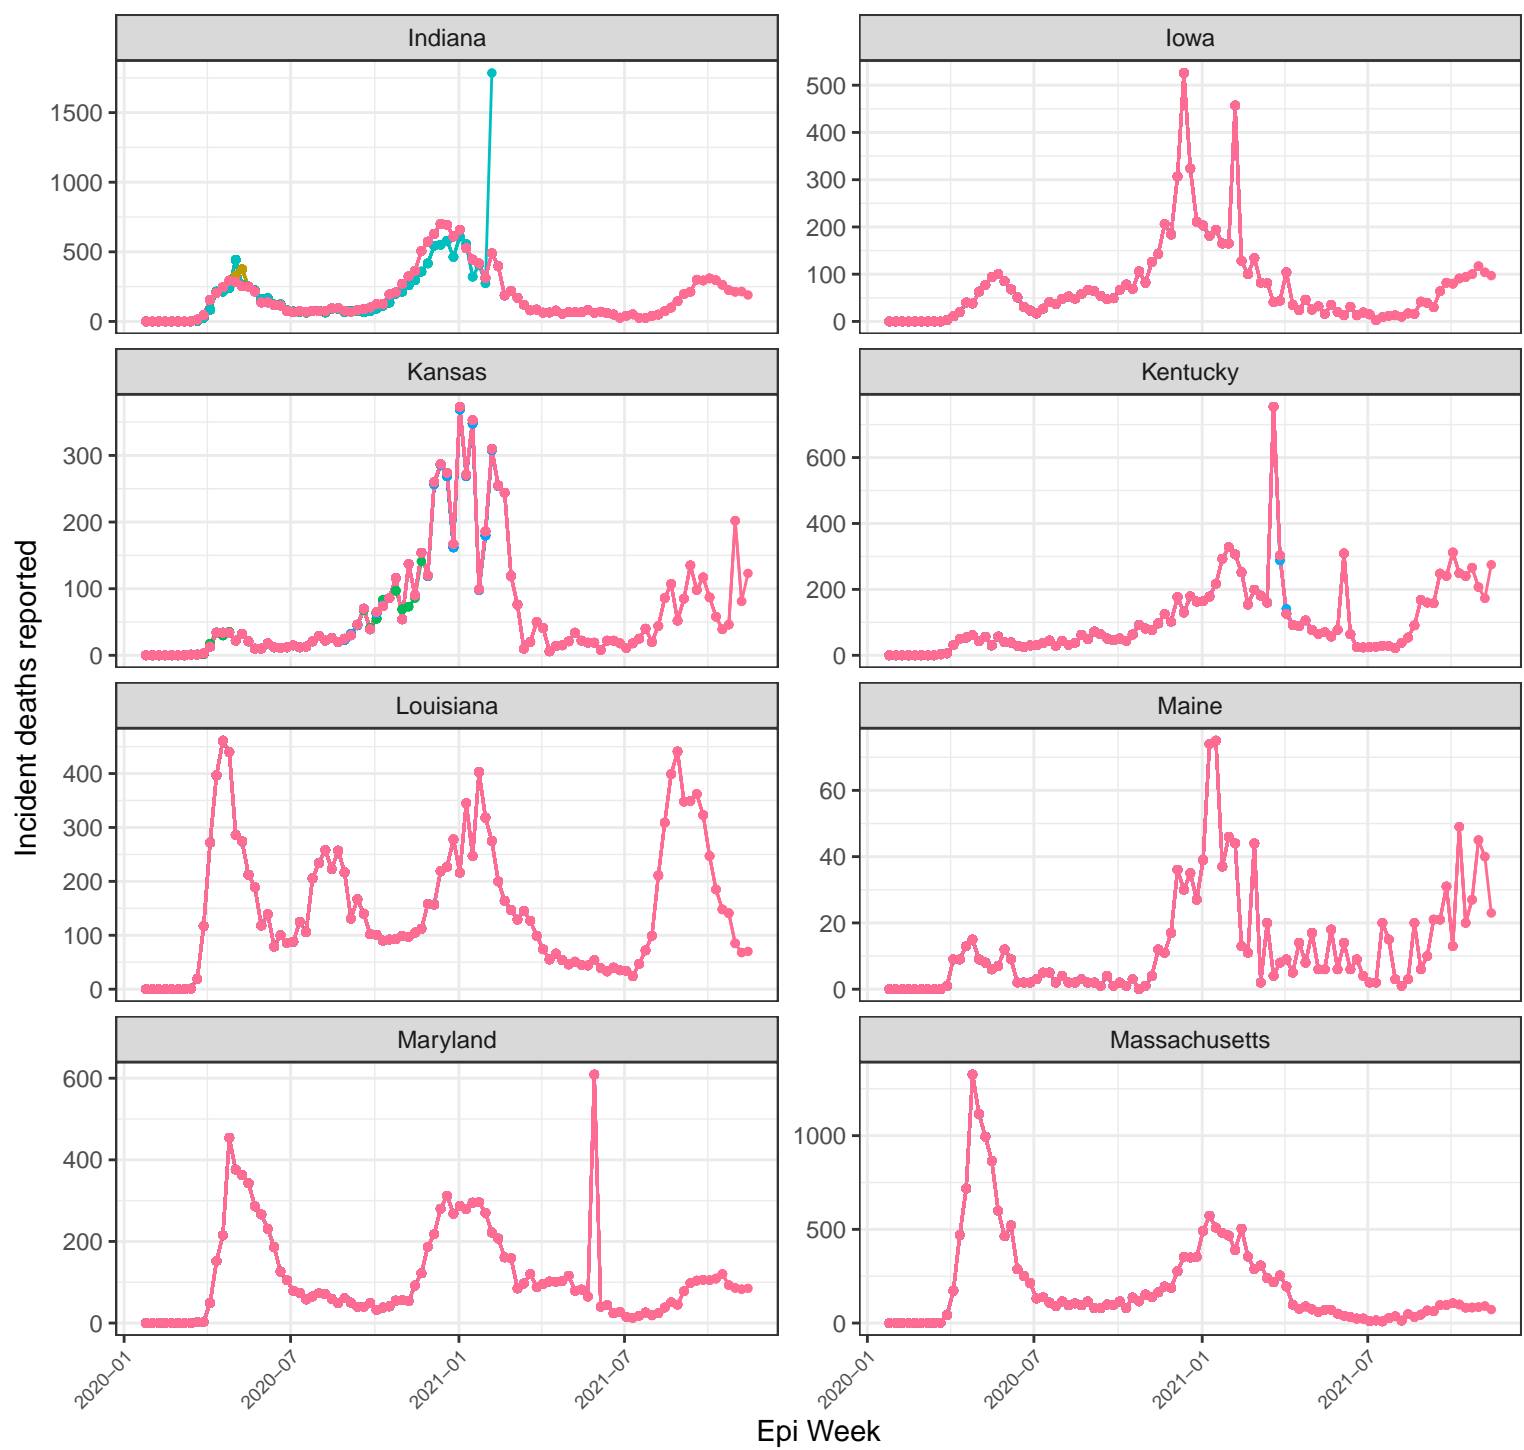

- Revision Date
- |            |            |            |            |            |
|------------|------------|------------|------------|------------|
| 2020-05-04 | 2020-08-31 | 2020-12-28 | 2021-04-26 | 2021-08-23 |
| 2020-05-11 | 2020-09-07 | 2021-01-04 | 2021-05-03 | 2021-08-30 |
| 2020-05-18 | 2020-09-14 | 2021-01-11 | 2021-05-10 | 2021-09-06 |
| 2020-05-25 | 2020-09-21 | 2021-01-18 | 2021-05-17 | 2021-09-13 |
| 2020-06-01 | 2020-09-28 | 2021-01-25 | 2021-05-24 | 2021-09-20 |
| 2020-06-08 | 2020-10-05 | 2021-02-01 | 2021-05-31 | 2021-09-27 |
| 2020-06-15 | 2020-10-12 | 2021-02-08 | 2021-06-07 | 2021-10-04 |
| 2020-06-22 | 2020-10-19 | 2021-02-15 | 2021-06-14 | 2021-10-11 |
| 2020-06-29 | 2020-10-26 | 2021-02-22 | 2021-06-21 | 2021-10-18 |
| 2020-07-06 | 2020-11-02 | 2021-03-01 | 2021-06-28 | 2021-10-25 |
| 2020-07-13 | 2020-11-09 | 2021-03-08 | 2021-07-05 | 2021-11-01 |
| 2020-07-20 | 2020-11-16 | 2021-03-15 | 2021-07-12 | 2021-11-08 |
| 2020-07-27 | 2020-11-23 | 2021-03-22 | 2021-07-19 | 2021-11-15 |
| 2020-08-03 | 2020-11-30 | 2021-03-29 | 2021-07-26 |            |
| 2020-08-10 | 2020-12-07 | 2021-04-05 | 2021-08-02 |            |
| 2020-08-17 | 2020-12-14 | 2021-04-12 | 2021-08-09 |            |
| 2020-08-24 | 2020-12-21 | 2021-04-19 | 2021-08-16 |            |

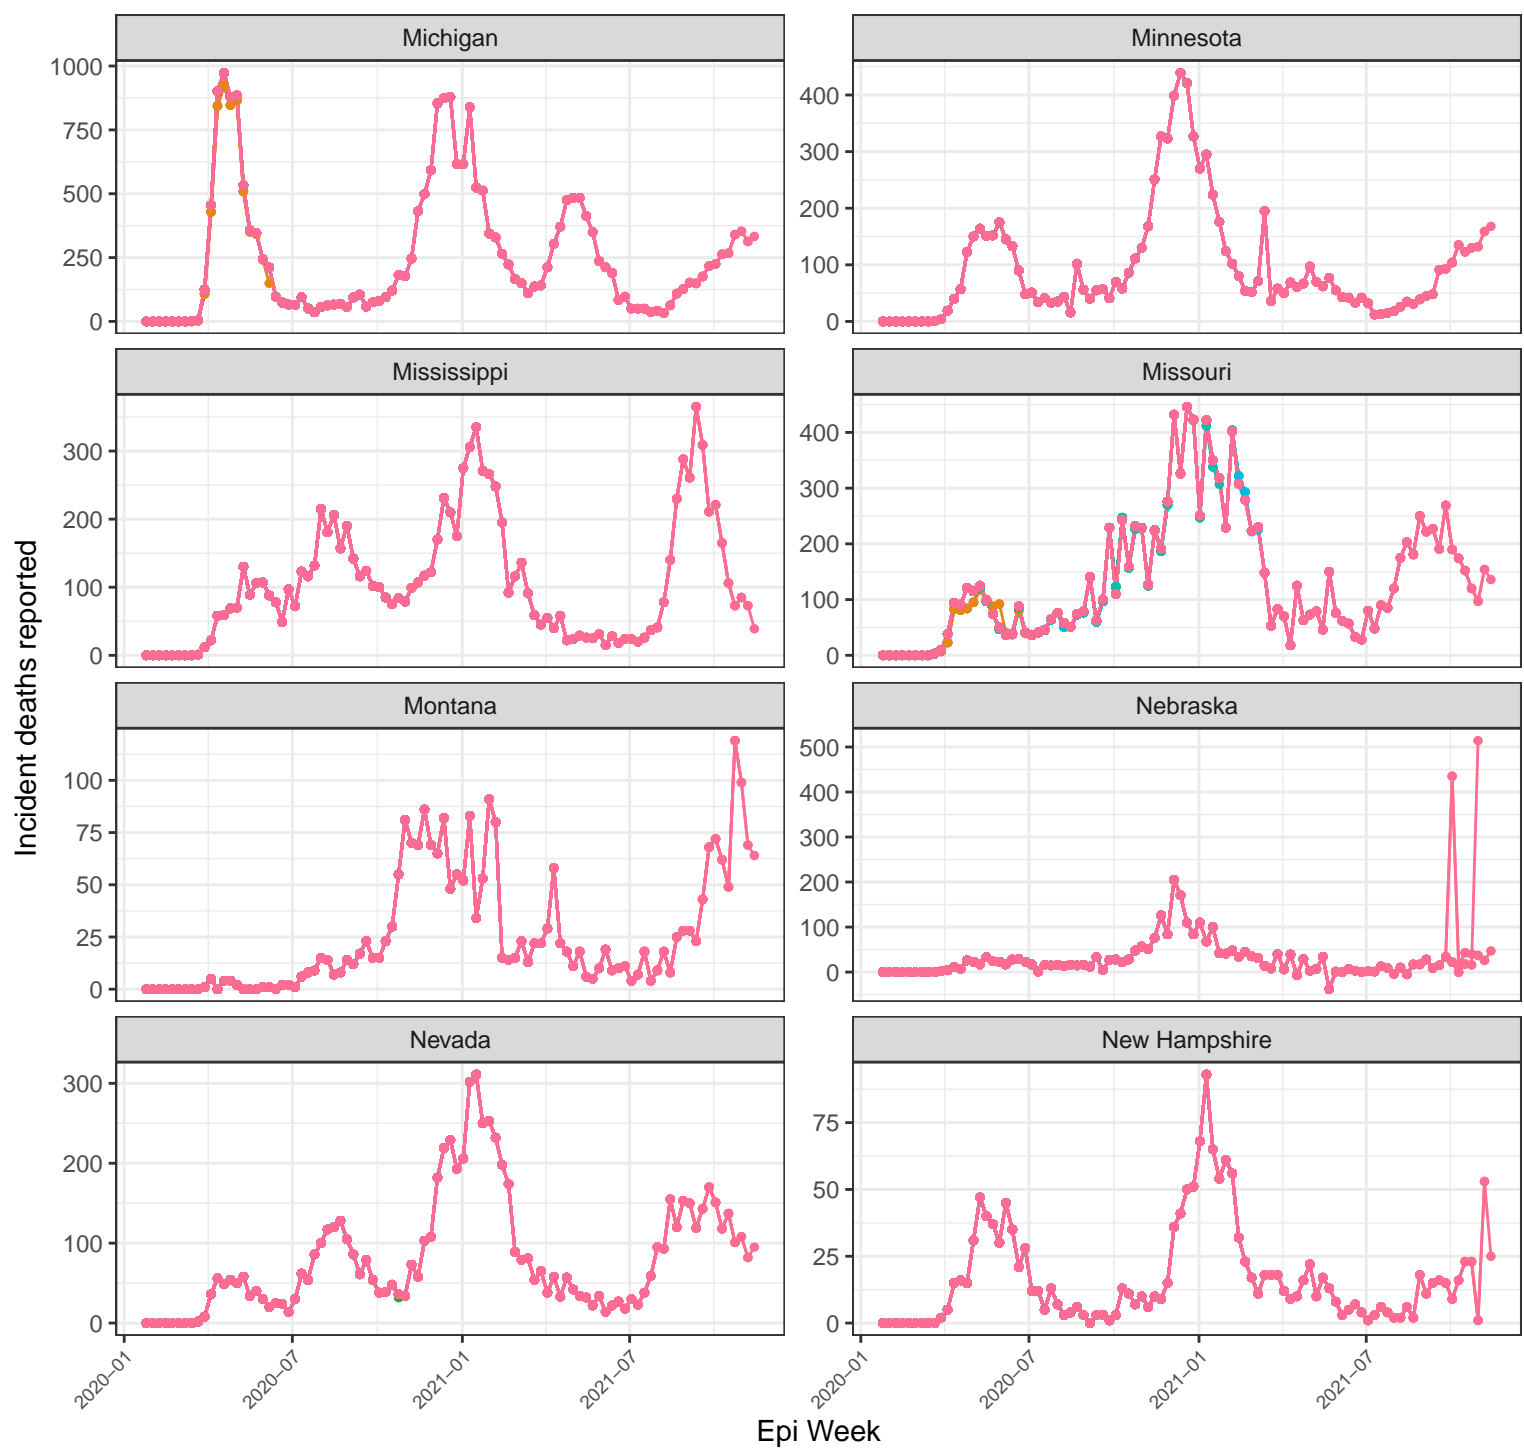

- Revision Date
- |            |            |            |            |            |
|------------|------------|------------|------------|------------|
| 2020-05-04 | 2020-08-31 | 2020-12-28 | 2021-04-26 | 2021-08-23 |
| 2020-05-11 | 2020-09-07 | 2021-01-04 | 2021-05-03 | 2021-08-30 |
| 2020-05-18 | 2020-09-14 | 2021-01-11 | 2021-05-10 | 2021-09-06 |
| 2020-05-25 | 2020-09-21 | 2021-01-18 | 2021-05-17 | 2021-09-13 |
| 2020-06-01 | 2020-09-28 | 2021-01-25 | 2021-05-24 | 2021-09-20 |
| 2020-06-08 | 2020-10-05 | 2021-02-01 | 2021-05-31 | 2021-09-27 |
| 2020-06-15 | 2020-10-12 | 2021-02-08 | 2021-06-07 | 2021-10-04 |
| 2020-06-22 | 2020-10-19 | 2021-02-15 | 2021-06-14 | 2021-10-11 |
| 2020-06-29 | 2020-10-26 | 2021-02-22 | 2021-06-21 | 2021-10-18 |
| 2020-07-06 | 2020-11-02 | 2021-03-01 | 2021-06-28 | 2021-10-25 |
| 2020-07-13 | 2020-11-09 | 2021-03-08 | 2021-07-05 | 2021-11-01 |
| 2020-07-20 | 2020-11-16 | 2021-03-15 | 2021-07-12 | 2021-11-08 |
| 2020-07-27 | 2020-11-23 | 2021-03-22 | 2021-07-19 | 2021-11-15 |
| 2020-08-03 | 2020-11-30 | 2021-03-29 | 2021-07-26 |            |
| 2020-08-10 | 2020-12-07 | 2021-04-05 | 2021-08-02 |            |
| 2020-08-17 | 2020-12-14 | 2021-04-12 | 2021-08-09 |            |
| 2020-08-24 | 2020-12-21 | 2021-04-19 | 2021-08-16 |            |

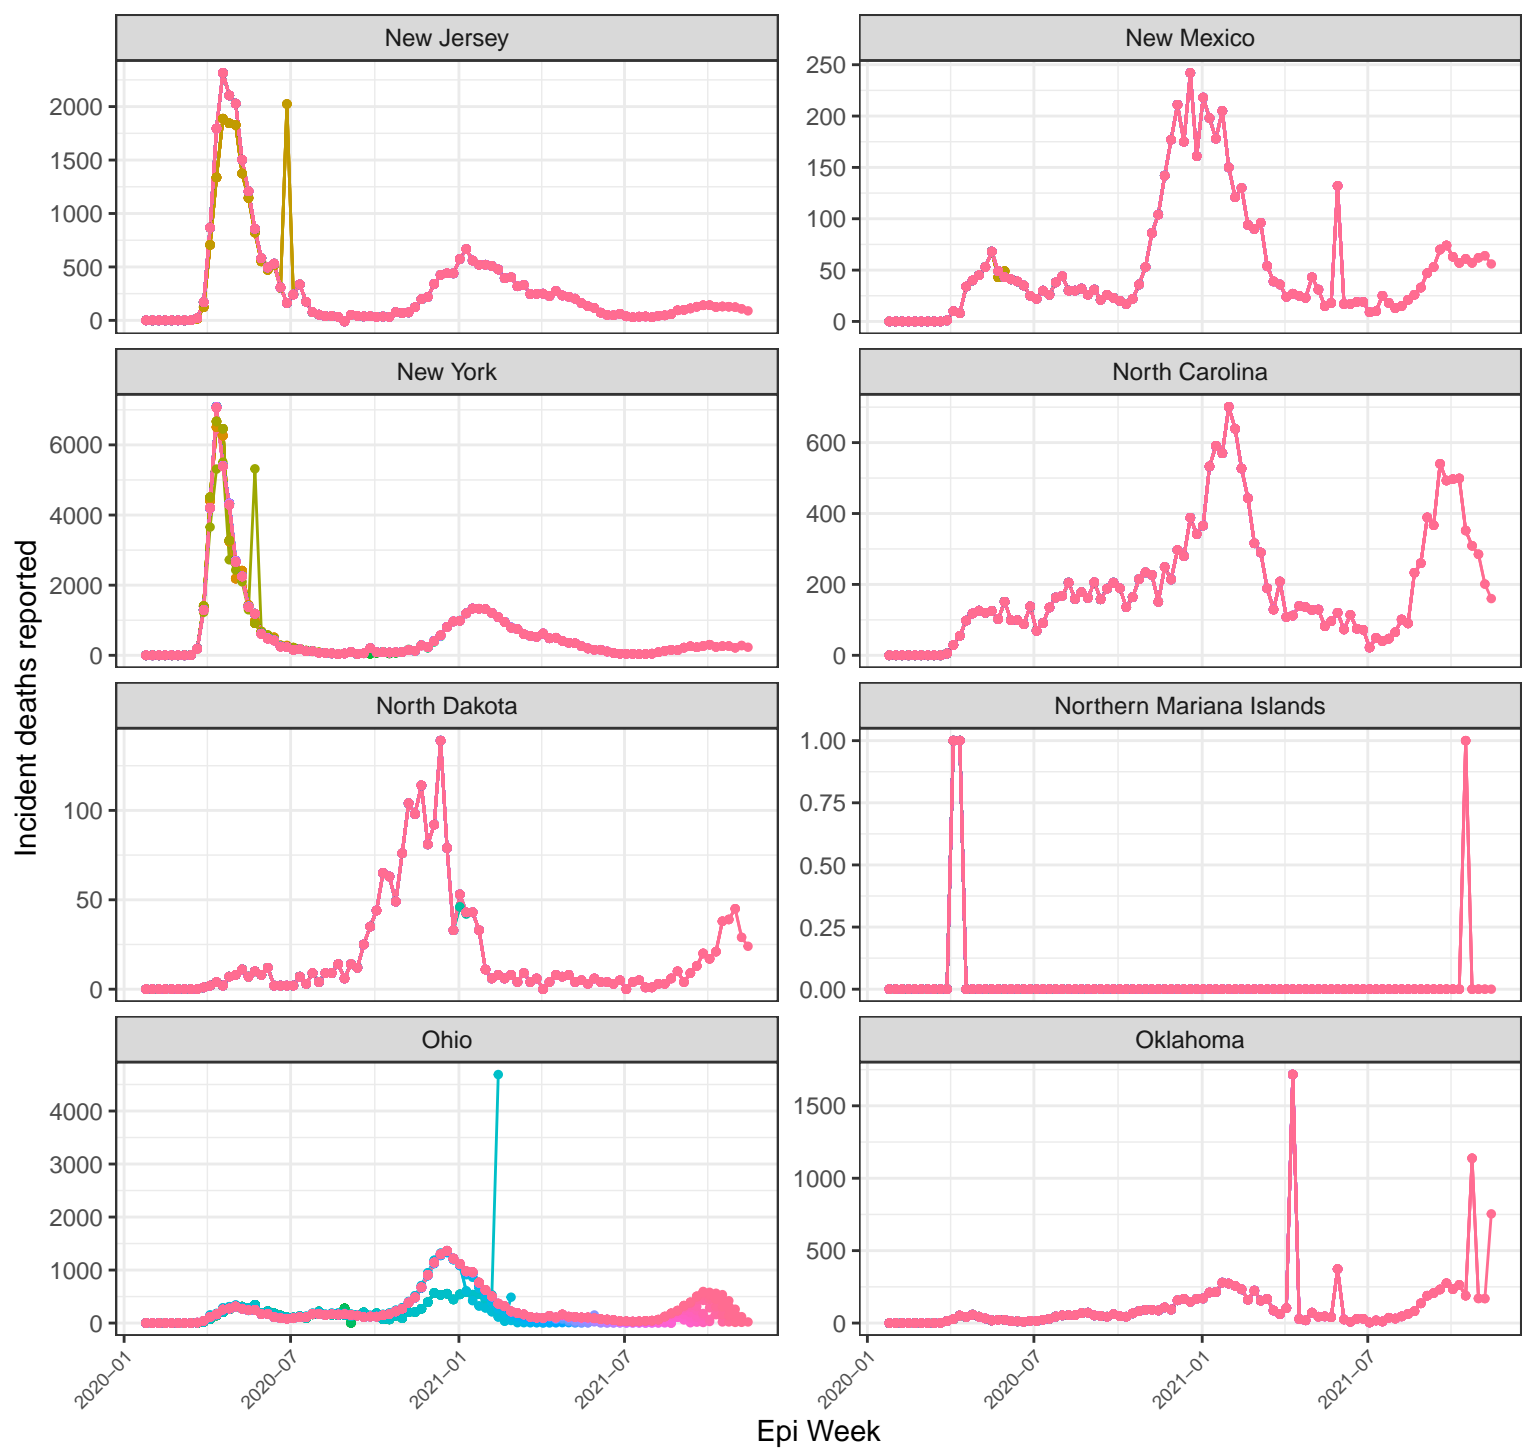

- Revision Date
- 2020-05-04
  - 2020-05-11
  - 2020-05-18
  - 2020-05-25
  - 2020-06-01
  - 2020-06-08
  - 2020-06-15
  - 2020-06-22
  - 2020-06-29
  - 2020-07-06
  - 2020-07-13
  - 2020-07-20
  - 2020-07-27
  - 2020-08-03
  - 2020-08-10
  - 2020-08-17
  - 2020-08-24
  - 2020-08-31
  - 2020-09-07
  - 2020-09-14
  - 2020-09-21
  - 2020-09-28
  - 2020-10-05
  - 2020-10-12
  - 2020-10-19
  - 2020-10-26
  - 2020-11-02
  - 2020-11-09
  - 2020-11-16
  - 2020-11-23
  - 2020-11-30
  - 2020-12-07
  - 2020-12-14
  - 2020-12-21
  - 2020-12-28
  - 2021-01-04
  - 2021-01-11
  - 2021-01-18
  - 2021-01-25
  - 2021-02-01
  - 2021-02-08
  - 2021-02-15
  - 2021-02-22
  - 2021-03-01
  - 2021-03-08
  - 2021-03-15
  - 2021-03-22
  - 2021-03-29
  - 2021-04-05
  - 2021-04-12
  - 2021-04-19
  - 2021-04-26
  - 2021-05-03
  - 2021-05-10
  - 2021-05-17
  - 2021-05-24
  - 2021-05-31
  - 2021-06-07
  - 2021-06-14
  - 2021-06-21
  - 2021-06-28
  - 2021-07-05
  - 2021-07-12
  - 2021-07-19
  - 2021-07-26
  - 2021-08-02
  - 2021-08-09
  - 2021-08-16
  - 2021-08-23
  - 2021-08-30
  - 2021-09-06
  - 2021-09-13
  - 2021-09-20
  - 2021-09-27
  - 2021-10-04
  - 2021-10-11
  - 2021-10-18
  - 2021-10-25
  - 2021-11-01
  - 2021-11-08
  - 2021-11-15

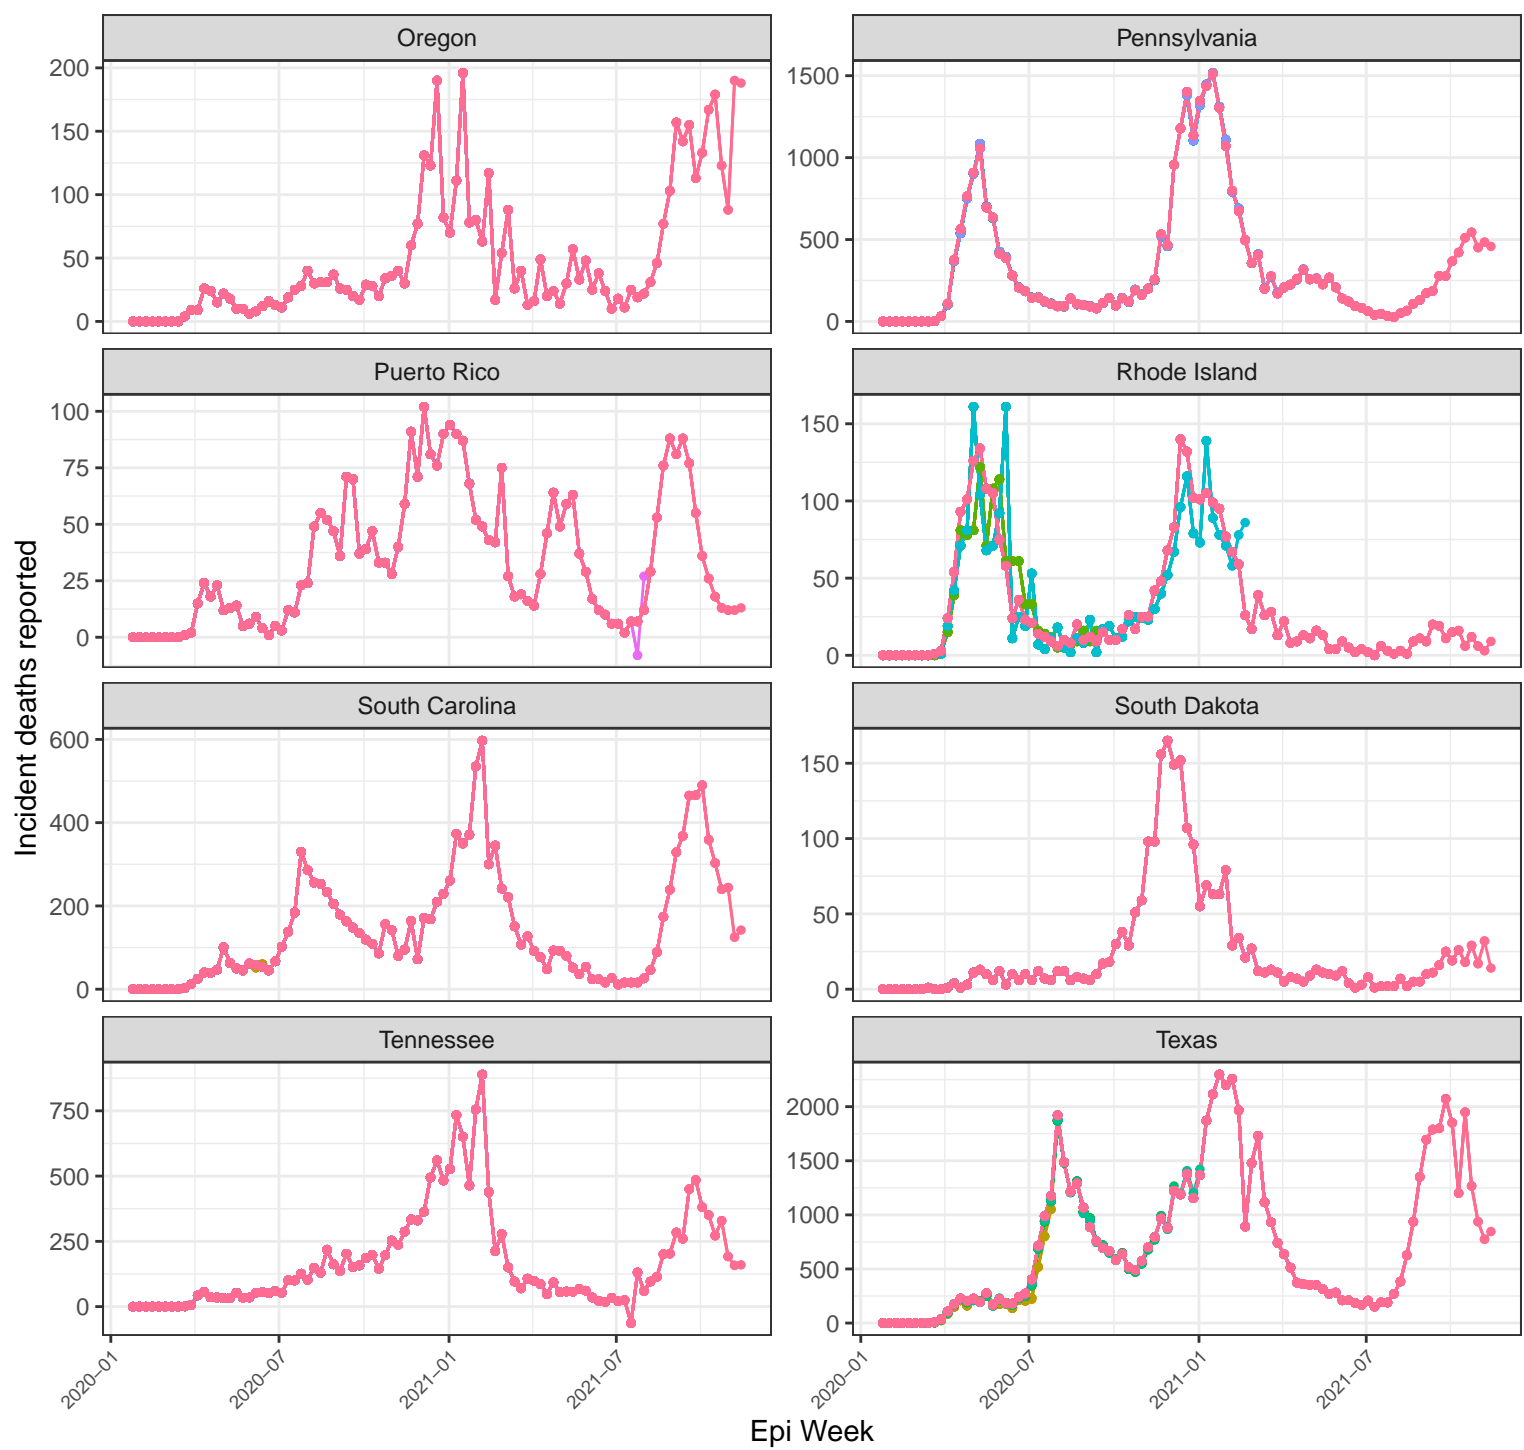

- Revision Date
- |            |            |            |            |            |
|------------|------------|------------|------------|------------|
| 2020-05-04 | 2020-08-31 | 2020-12-28 | 2021-04-26 | 2021-08-23 |
| 2020-05-11 | 2020-09-07 | 2021-01-04 | 2021-05-03 | 2021-08-30 |
| 2020-05-18 | 2020-09-14 | 2021-01-11 | 2021-05-10 | 2021-09-06 |
| 2020-05-25 | 2020-09-21 | 2021-01-18 | 2021-05-17 | 2021-09-13 |
| 2020-06-01 | 2020-09-28 | 2021-01-25 | 2021-05-24 | 2021-09-20 |
| 2020-06-08 | 2020-10-05 | 2021-02-01 | 2021-05-31 | 2021-09-27 |
| 2020-06-15 | 2020-10-12 | 2021-02-08 | 2021-06-07 | 2021-10-04 |
| 2020-06-22 | 2020-10-19 | 2021-02-15 | 2021-06-14 | 2021-10-11 |
| 2020-06-29 | 2020-10-26 | 2021-02-22 | 2021-06-21 | 2021-10-18 |
| 2020-07-06 | 2020-11-02 | 2021-03-01 | 2021-06-28 | 2021-10-25 |
| 2020-07-13 | 2020-11-09 | 2021-03-08 | 2021-07-05 | 2021-11-01 |
| 2020-07-20 | 2020-11-16 | 2021-03-15 | 2021-07-12 | 2021-11-08 |
| 2020-07-27 | 2020-11-23 | 2021-03-22 | 2021-07-19 | 2021-11-15 |
| 2020-08-03 | 2020-11-30 | 2021-03-29 | 2021-07-26 |            |
| 2020-08-10 | 2020-12-07 | 2021-04-05 | 2021-08-02 |            |
| 2020-08-17 | 2020-12-14 | 2021-04-12 | 2021-08-09 |            |
| 2020-08-24 | 2020-12-21 | 2021-04-19 | 2021-08-16 |            |

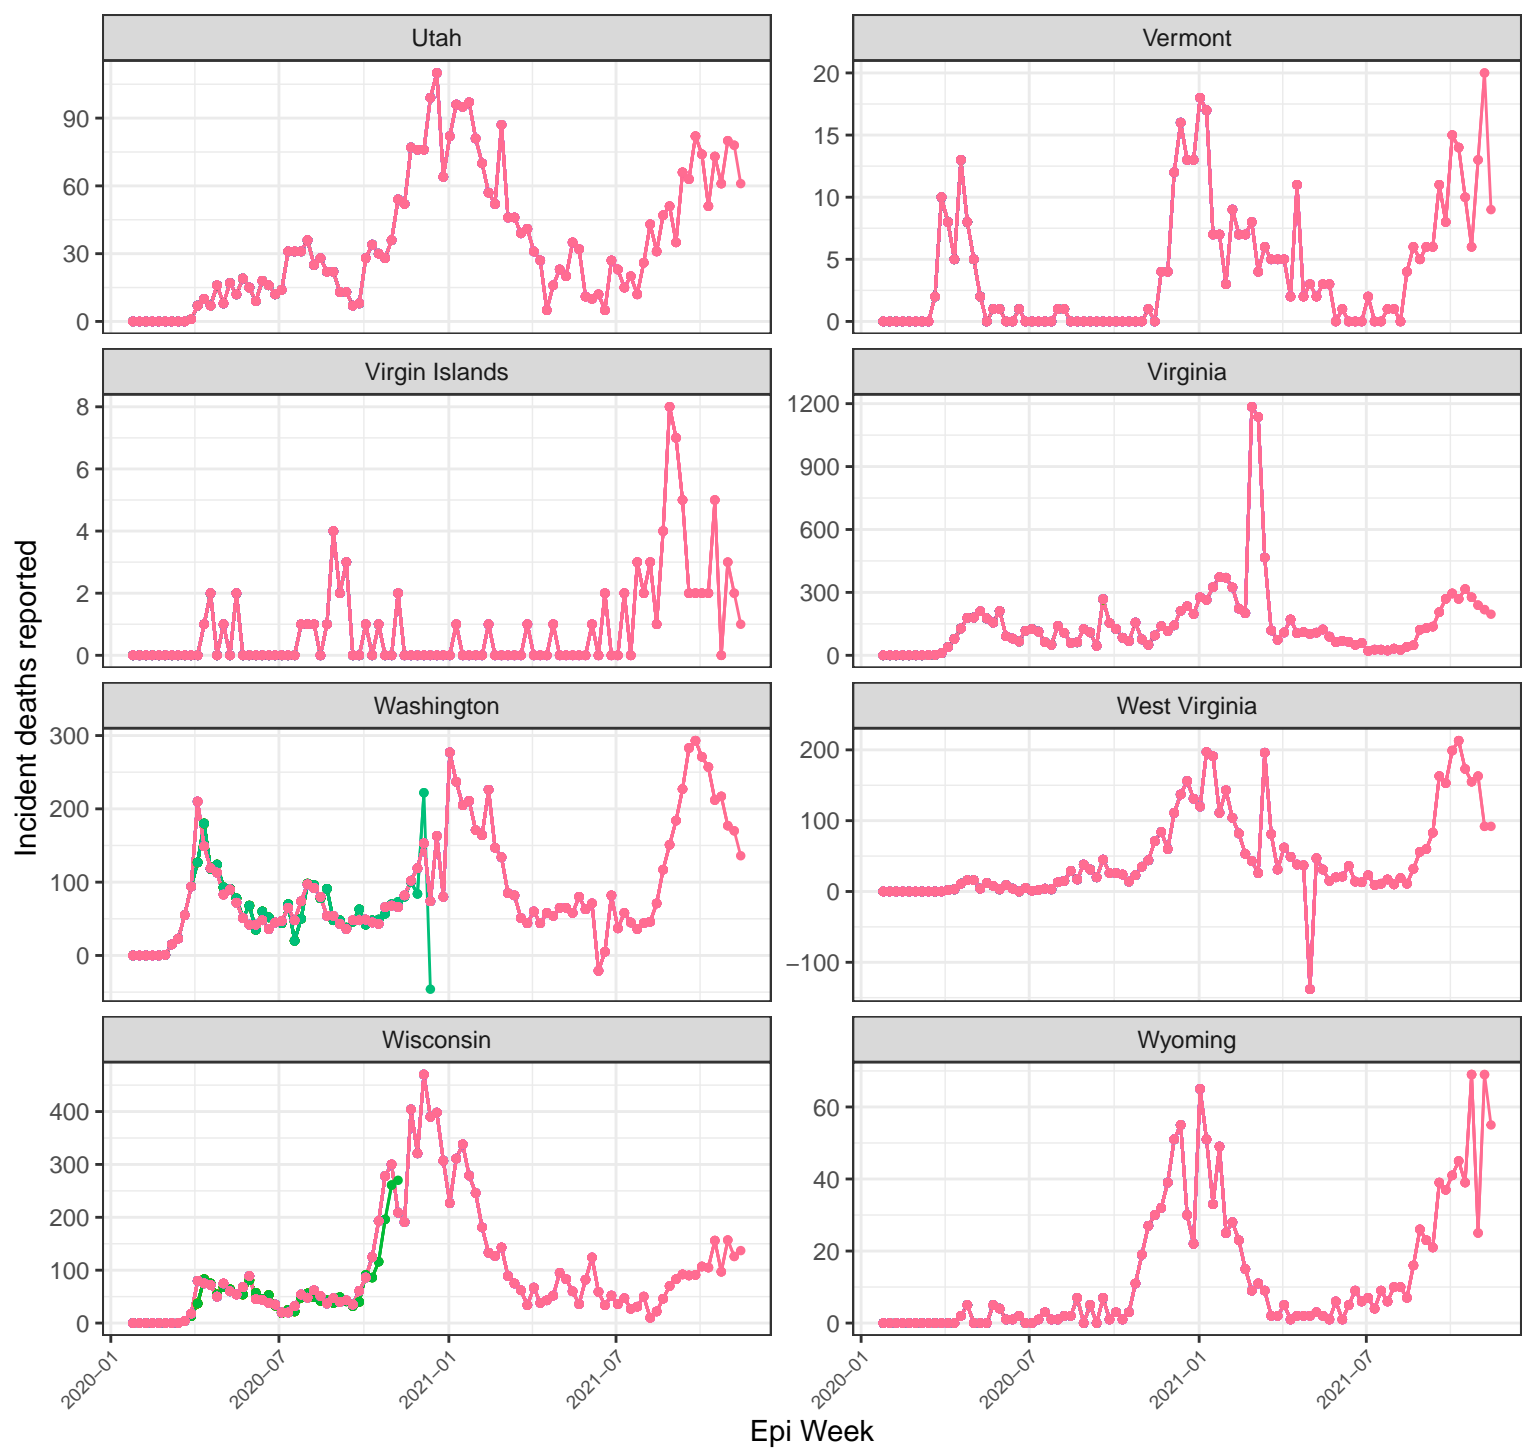

- Revision Date
- |              |              |              |              |              |
|--------------|--------------|--------------|--------------|--------------|
| ● 2020-05-04 | ● 2020-08-31 | ● 2020-12-28 | ● 2021-04-26 | ● 2021-08-23 |
| ● 2020-05-11 | ● 2020-09-07 | ● 2021-01-04 | ● 2021-05-03 | ● 2021-08-30 |
| ● 2020-05-18 | ● 2020-09-14 | ● 2021-01-11 | ● 2021-05-10 | ● 2021-09-06 |
| ● 2020-05-25 | ● 2020-09-21 | ● 2021-01-18 | ● 2021-05-17 | ● 2021-09-13 |
| ● 2020-06-01 | ● 2020-09-28 | ● 2021-01-25 | ● 2021-05-24 | ● 2021-09-20 |
| ● 2020-06-08 | ● 2020-10-05 | ● 2021-02-01 | ● 2021-05-31 | ● 2021-09-27 |
| ● 2020-06-15 | ● 2020-10-12 | ● 2021-02-08 | ● 2021-06-07 | ● 2021-10-04 |
| ● 2020-06-22 | ● 2020-10-19 | ● 2021-02-15 | ● 2021-06-14 | ● 2021-10-11 |
| ● 2020-06-29 | ● 2020-10-26 | ● 2021-02-22 | ● 2021-06-21 | ● 2021-10-18 |
| ● 2020-07-06 | ● 2020-11-02 | ● 2021-03-01 | ● 2021-06-28 | ● 2021-10-25 |
| ● 2020-07-13 | ● 2020-11-09 | ● 2021-03-08 | ● 2021-07-05 | ● 2021-11-01 |
| ● 2020-07-20 | ● 2020-11-16 | ● 2021-03-15 | ● 2021-07-12 | ● 2021-11-08 |
| ● 2020-07-27 | ● 2020-11-23 | ● 2021-03-22 | ● 2021-07-19 | ● 2021-11-15 |
| ● 2020-08-03 | ● 2020-11-30 | ● 2021-03-29 | ● 2021-07-26 |              |
| ● 2020-08-10 | ● 2020-12-07 | ● 2021-04-05 | ● 2021-08-02 |              |
| ● 2020-08-17 | ● 2020-12-14 | ● 2021-04-12 | ● 2021-08-09 |              |
| ● 2020-08-24 | ● 2020-12-21 | ● 2021-04-19 | ● 2021-08-16 |              |
